# Supplementary material for: Colostrum Quality in Different Goat Breeds Reared in Northern Italy
Source: MDPI journal article supplement (doi:10.3390/ani13193146), 2023-10-09
Supplement: s1 [file s1]

## Supplementary material

**Table S1.** Litter size per breed.

| Number of kids | Breed                      |                            |                            |                            | Total           |
|----------------|----------------------------|----------------------------|----------------------------|----------------------------|-----------------|
|                | Camosciata                 | Frissa                     | Lariana                    | Orobica                    |                 |
| <b>1</b>       | 5 <sub>a</sub><br>(17.9%)  | 18 <sub>b</sub><br>(62.1%) | 22 <sub>b</sub><br>(81.5%) | 15 <sub>b</sub><br>(83.3%) | 60<br>(58.8%)   |
| <b>2</b>       | 21 <sub>a</sub><br>(75.0%) | 11 <sub>b</sub><br>(37.9%) | 5 <sub>b</sub><br>(18.5%)  | 3 <sub>b</sub><br>(16.7%)  | 40<br>(39.2%)   |
| <b>3</b>       | 2 <sub>a</sub><br>(7.1%)   | 0 <sub>a</sub><br>(0.0%)   | 0 <sub>a</sub><br>(0.0%)   | 0 <sub>a</sub><br>(0.0%)   | 2<br>(2.0%)     |
| <b>Total</b>   | 28<br>(100.0%)             | 29<br>(100.0%)             | 27<br>(100.0%)             | 18<br>(100.0%)             | 102<br>(100.0%) |

Each subscript letter denotes a subset of Breed categories whose column proportions do not differ significantly from each other at the 0.05 level.
